# Supplementary material for: Corrigendum to “Cerium Oxide Nanoparticles Induced Toxicity in Human Lung Cells: Role of ROS Mediated DNA Damage and Apoptosis”
Source: Hindawi journal article supplement (doi:10.1155/2018/6349540), 2018-12-16

**Panel – 1 (Figure 9A)**

**BAX**

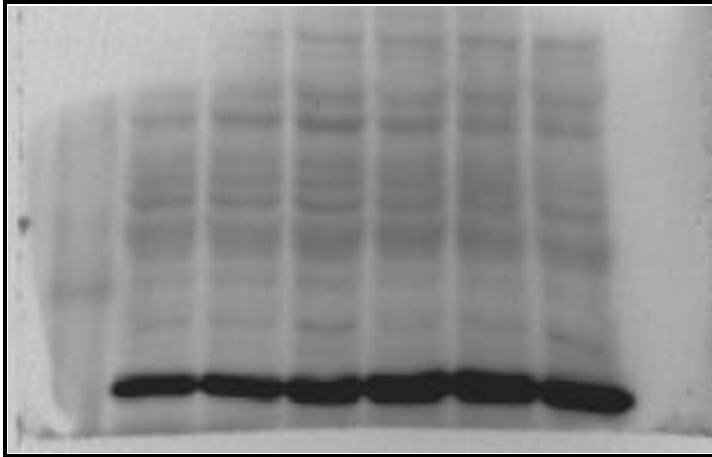

**BCI-2**

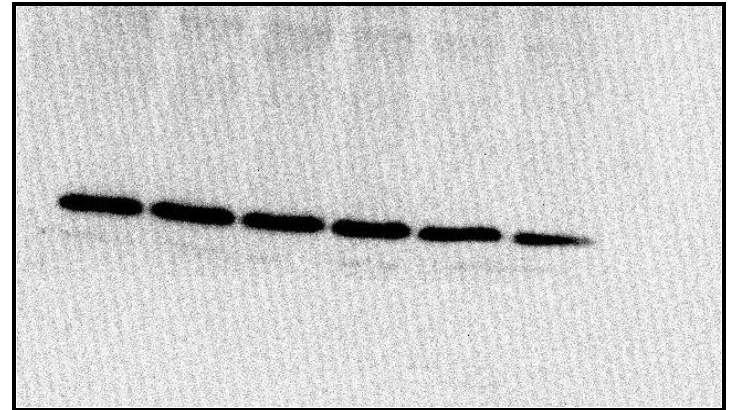

**Cyto C**

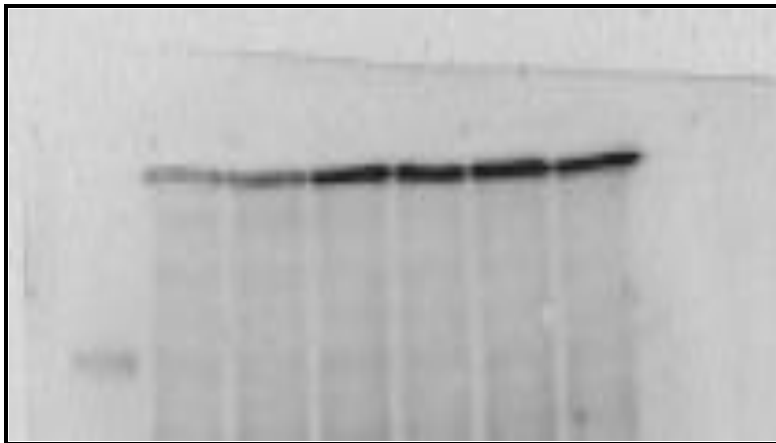

**$\beta$ -Actin**

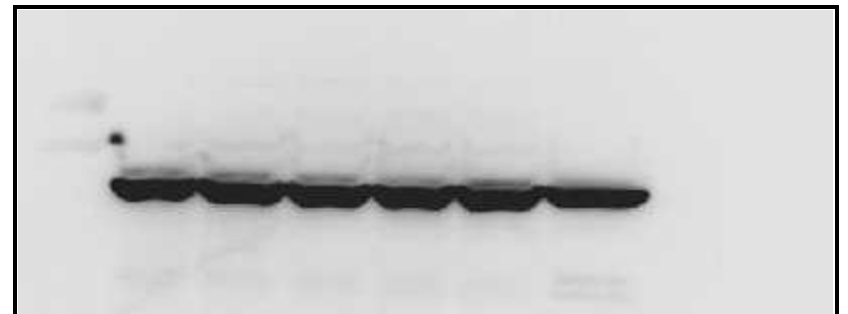

## Panel – 2 (Figure 9B)

**Caspase 3**

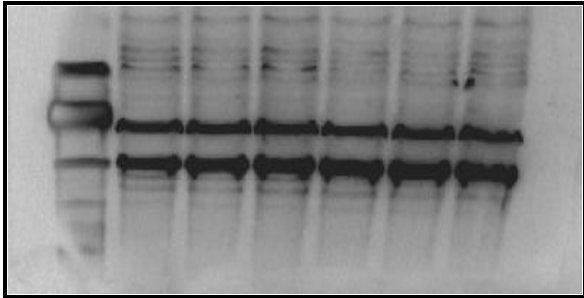

**Caspase 9**

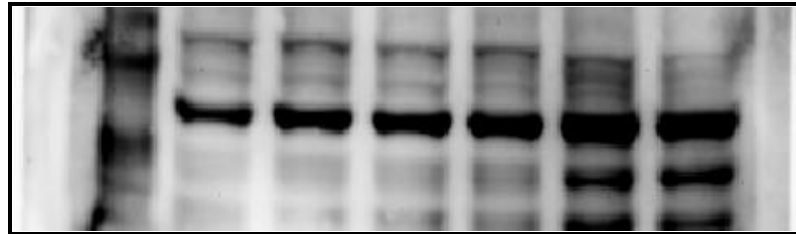

**Apaf-1**

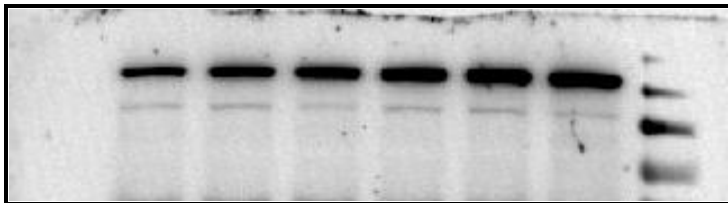

**$\beta$ -Actin**

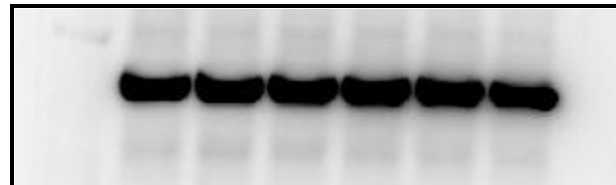

**Panel – 3 (Figure 9C)**

**Uncleaved PARP**

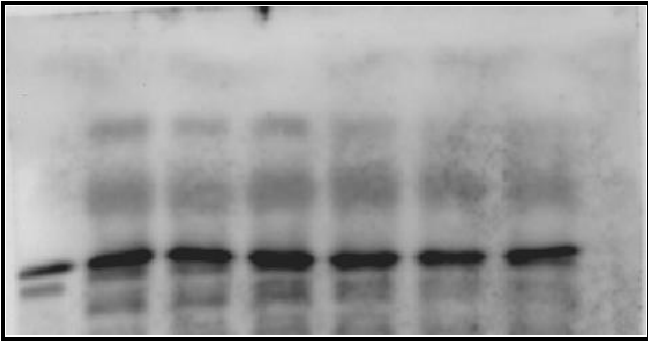

**p53**

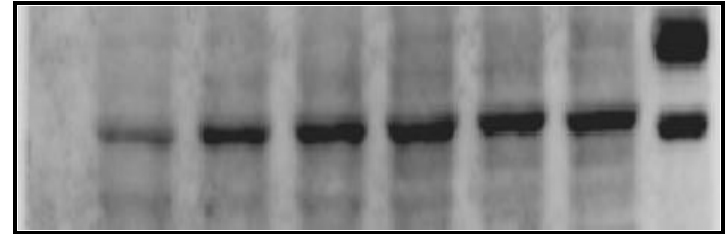

**PARP**

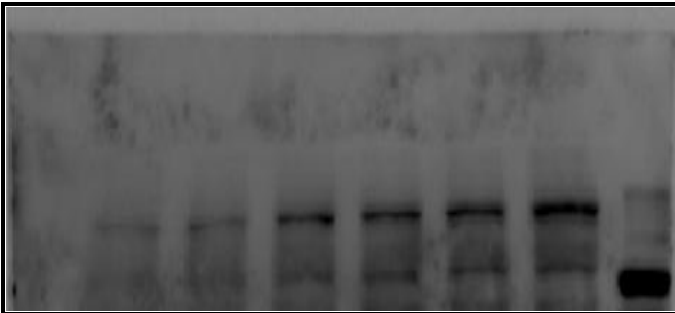

**$\beta$ -Actin**

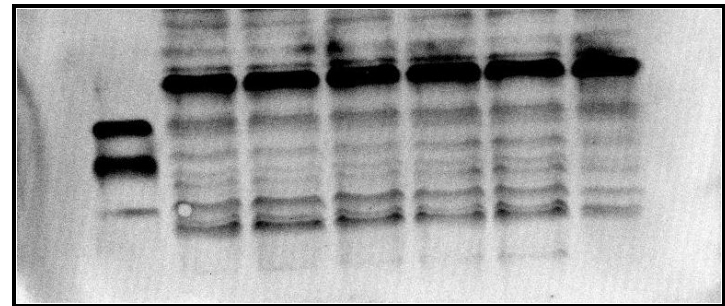

## Revised Image for Panel – 3 (Figure 9C)

**Phospho p53**

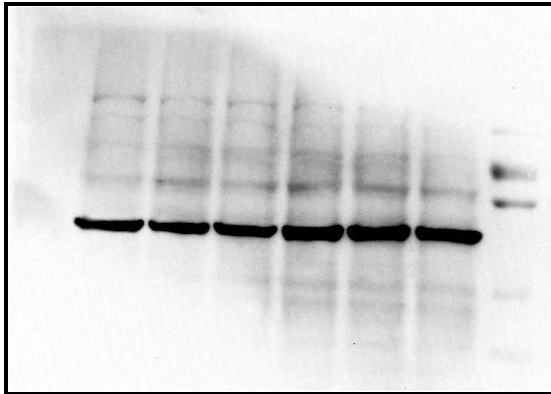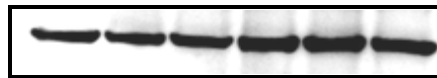

Supplement: f1 [file 6349540.f1.pdf]
